# Supplementary material for: Fruit Quality and Metabolomic Analyses of Fresh Food Accessions Provide Insights into the Key Carbohydrate Metabolism in Blueberry
Source: MDPI journal article supplement (doi:10.3390/plants12183200), 2023-09-07
Supplement: s1 [file s1]

**Table S1.** Pedigree information of 11 highbush blueberry cultivars.

| Cultivars  | Type | Pedigree                                                           |
|------------|------|--------------------------------------------------------------------|
| Bluerain   | SHB  | No literature                                                      |
| O'Neal     | SHB  | Wolcott (Weymouth × (Stanley × Crabbe 4)) × Fla 4-15               |
| Star       | SHB  | O'Neal × FL80-31                                                   |
| Camellia   | SHB  | MS-122×MS-6 (Darrow progeny)                                       |
| Misty      | SHB  | Florida 67-1 (E-30 × Florida 61-7) × Avonblue (E-66 × Florida 1-3) |
| Zhongzhi3  | SHB  | No literature                                                      |
| Springhigh | SHB  | No literature                                                      |
| Anna       | SHB  | No literature                                                      |
| Brigitta   | NHB  | Lateblue × Bluecrop                                                |
| Darrow     | NHB  | (Wareham×Pioneer) × Bluecrop                                       |
| Duke       | NHB  | (Ivanhoe×Earliblue) × (Berkeley×Earliblue) × (Coville×Atlantic)    |
