# Supplementary material for: Fruit Quality and Metabolomic Analyses of Fresh Food Accessions Provide Insights into the Key Carbohydrate Metabolism in Blueberry
Source: MDPI journal article supplement (doi:10.3390/plants12183200), 2023-09-07
Supplement: s1 [file s1]

**Table S2.** Primer sequences of sugar metabolic genes in qRT-PCR for blueberry fruits.

| Name           | Forward primer (5' to 3') | Reverse primer (5' to 3') | Length/bp | References          |
|----------------|---------------------------|---------------------------|-----------|---------------------|
| <i>VcBAM</i>   | GCTGGAACTCATTGGCACTACA    | CCTGGTTGCTCTCCGTCTCT      | 170       | Nguyen et al., 2021 |
| <i>VcINV</i>   | GTGCTCGTGAGATGCTTGCT      | CCACCAACCAAGGAGGAATCTG    | 216       | Nguyen et al., 2021 |
| <i>VcSPS</i>   | CGTTGAGGAGGAGGAAGCATAT    | AAGACTGTGTTTCAGCCAAAGT    | 168       | Nguyen et al., 2021 |
| <i>VcTMT</i>   | GTACAGAGTCCGCATCCTTCCT    | TGTGGTGAGCAGTAGTGCCTT     | 119       | Nguyen et al., 2021 |
| <i>VcSPS1</i>  | CCAGGAGGAATCACAACCATGCG   | TGCGGCGTATAGAGGCTGAGG     | 199       | Wang et al., 2020   |
| <i>VcSS1</i>   | TCTCATCGTGACTCGGCTTCTCC   | GCAACATCCTCGGTGAATGTCTCC  | 189       | Wang et al., 2020   |
| <i>VcNIN2</i>  | AGCAAGAATGCGAGTGCCGATG    | TGCTTCGAGAGGCTGTTGTGAAC   | 139       | Wang et al., 2020   |
| <i>VcINV9</i>  | GTGTAGCCGAGCCTATGTTCAAGT  | CAGTGGAGGAAGTGGAGAAGTTGC  | 102       | Wang et al., 2020   |
| <i>VcActin</i> | CTTGCAATCCCTCAGCACCT      | TCCTGTGGACAATGGATG        | 171       | Wang et al., 2020   |
